# Supplementary material for: NMR parameters in alkali, alkaline earth and rare earth fluorides from first principle calculations
Source: Royal Society of Chemistry journal article supplement (doi:10.1039/c1cp21253b), 2011-01-01
Supplement: c1cp21253b.pdf [file c1cp21253b.pdf]

# NMR parameters in alkali, alkaline earth and rare earth fluorides from first principle calculations

Aymeric Sadoc, Monique Body, Christophe Legein, Mamata Biswal, Franck Fayon, Xavier  
Rocquefelte and Florent Boucher

## Electronic Supplementary Information Table of content

|                                                                                                                                                                                                                                                                     |    |
|---------------------------------------------------------------------------------------------------------------------------------------------------------------------------------------------------------------------------------------------------------------------|----|
| <b>Experimental conditions used for <math>^{19}\text{F}</math> solid state NMR spectroscopy</b> .....                                                                                                                                                               | 2  |
| <b>Figure S1.</b> $^{19}\text{F}$ experimental MAS NMR spectra of alkali fluorides .....                                                                                                                                                                            | 2  |
| <b>Figure S2.</b> $^{19}\text{F}$ experimental MAS NMR spectra of alkaline earth fluorides.....                                                                                                                                                                     | 3  |
| <b>Solid state NMR and PXRD study of <math>\text{ScF}_3</math></b> .....                                                                                                                                                                                            | 3  |
| <b>Figure S3.</b> PXRD diagrams of $\text{ScF}_3$ .....                                                                                                                                                                                                             | 4  |
| <b>Table S1.</b> (h,k,l) reflections and corresponding $2\theta$ values ( $^\circ$ ) of $\text{ScF}_3$ assuming Pm-3m and R32 space groups.....                                                                                                                     | 5  |
| <b>Figure S4.</b> Experimental and reconstructed $^{19}\text{F}$ MAS NMR spectra of $\text{ScF}_3$ .....                                                                                                                                                            | 5  |
| <b>Table S2.</b> $^{19}\text{F}$ isotropic chemical shifts, chemical shift anisotropies, asymmetry parameters, line widths and relative intensities determined from the reconstruction of the $^{19}\text{F}$ NMR spectrum of $\text{ScF}_3$ .....                  | 5  |
| <b>Figure S5.</b> Experimental $^{45}\text{Sc}$ SATRAS MAS NMR spectrum of $\text{ScF}_3$ .....                                                                                                                                                                     | 6  |
| <b>Figure S6.</b> Experimental and reconstructed $^{19}\text{F}$ MAS NMR spectra of $\text{YF}_3$ .....                                                                                                                                                             | 6  |
| <b>Table S3.</b> $^{19}\text{F}$ isotropic chemical shifts, chemical shift anisotropies, asymmetry parameters, line widths, relative intensities determined from the reconstruction of the $^{19}\text{F}$ NMR spectrum of $\text{YF}_3$ and line assignment.....   | 7  |
| <b>Figure S7.</b> Experimental and reconstructed $^{19}\text{F}$ MAS NMR spectra of $\text{LaF}_3$ .....                                                                                                                                                            | 7  |
| <b>Table S4.</b> $^{19}\text{F}$ isotropic chemical shifts, chemical shift anisotropies, asymmetry parameters, line widths, relative intensities determined from the reconstruction of the $^{19}\text{F}$ NMR spectrum of $\text{LaF}_3$ and line assignment. .... | 7  |
| <b>Table S5.</b> Parameters used to generate the OTF USPP pseudopotentials.....                                                                                                                                                                                     | 8  |
| <b>Table S6.</b> Fractional atomic coordinates from the initial (IS) and PBE-DFT geometry-optimized (APO) structures for $\text{MgF}_2$ .....                                                                                                                       | 8  |
| <b>Table S7.</b> Mg-F bond lengths and F-Mg-F bond angles deduced from the initial (IS) and PBE-DFT geometry-optimized (APO) structures for $\text{MgF}_2$ .....                                                                                                    | 8  |
| <b>Table S8.</b> Eigenvectors of the calculated $^{25}\text{Mg}$ EFG tensor .....                                                                                                                                                                                   | 9  |
| <b>Table S9.</b> Fractional atomic coordinates from the initial (IS) and PBE-DFT geometry-optimized (APO) structures for $\text{YF}_3$ .....                                                                                                                        | 9  |
| <b>Table S10.</b> Y-F bond lengths deduced from the initial (IS) and PBE-DFT geometry-optimized (APO) structures for $\text{YF}_3$ .....                                                                                                                            | 9  |
| <b>Table S11.</b> Fractional atomic coordinates from the initial (IS) and PBE-DFT geometry-optimized (APO) structures for $\text{LaF}_3$ .....                                                                                                                      | 9  |
| <b>Table S12.</b> La-F bond lengths deduced from the initial (IS) and PBE-DFT geometry-optimized (APO) structures for $\text{LaF}_3$ .....                                                                                                                          | 10 |
| <b>Table S13.</b> Eigenvectors of the calculated $^{139}\text{La}$ EFG tensor in $\text{LaF}_3$ .....                                                                                                                                                               | 10 |
| <b>Table S14.</b> Experimental $^{19}\text{F}$ isotropic chemical shifts and calculated $^{19}\text{F}$ isotropic shielding for the eleven compounds additionally considered in Figure 5 .....                                                                      | 11 |
| <b>References.</b> .....                                                                                                                                                                                                                                            | 12 |

### Experimental conditions used for $^{19}\text{F}$ solid state NMR spectroscopy

The  $^{19}\text{F}$  solid-state MAS NMR experiments were conducted on Avance 300 (magnetic field of 7.0 T) and Avance 750 (magnetic field of 17.6 T) Bruker spectrometers operating at Larmor frequencies of 282.2 and 705.85 MHz, respectively, using 2.5 mm and 1.3 mm CPMAS probehead. All spectra were acquired using a Hahn echo sequence with an inter-pulse delay equal to one rotor period, except  $\text{CaF}_2$  and  $\text{LaF}_3$  for which a single pulse sequence was used. The recycle delays were set to 10 s for  $\text{LiF}$ ,  $\text{NaF}$ ,  $\text{KF}$ ,  $\text{RbF}$ ,  $\text{CsF}$ ,  $\text{MgF}_2$ ,  $\text{CaF}_2$ ,  $\text{SrF}_2$ ,  $\text{BaF}_2$  and  $\text{ScF}_3$  and 30 s for  $\text{YF}_3$  and  $\text{LaF}_3$ .  $^{19}\text{F}$  nutation frequencies ranging between 93 (2.5 mm probehead) and 195 kHz (1.3 mm probehead) were used. The  $^{19}\text{F}$  chemical shifts were referenced to  $\text{CFCl}_3$  at 0 ppm.

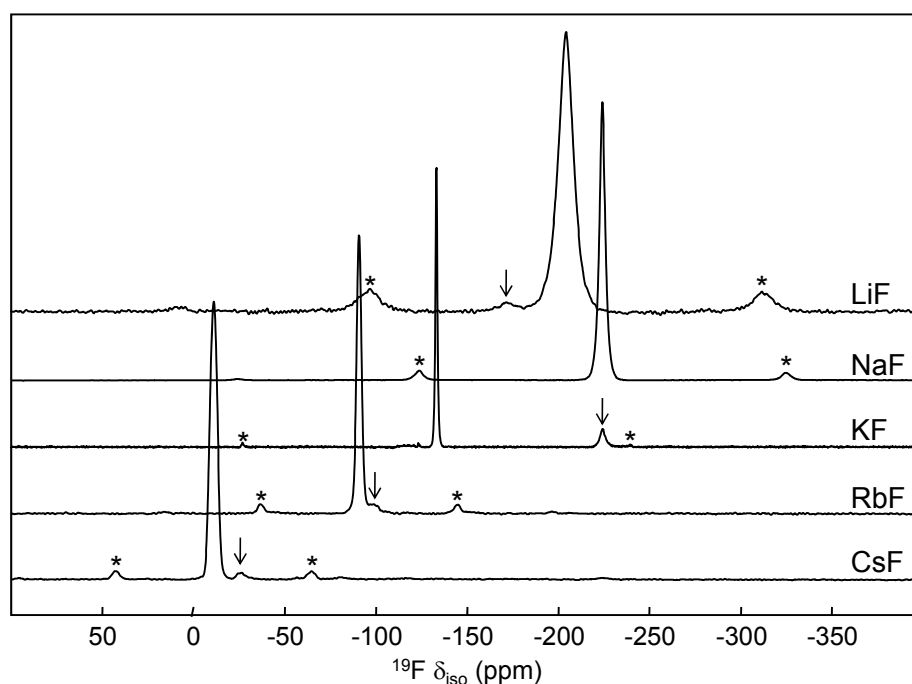

**Figure S1.**  $^{19}\text{F}$  MAS NMR spectra of alkaline fluorides obtained at a magnetic field of 7.0 T using spinning frequencies of 30 kHz for LiF, 25 kHz for NaF and KF and 15 kHz for RbF and CsF. The arrows on the NMR spectra of LiF, RbF and CsF indicate unidentified impurities. The arrow on the spectrum of KF indicates an impurity identified as NaF. The asterisks indicate spinning sidebands.

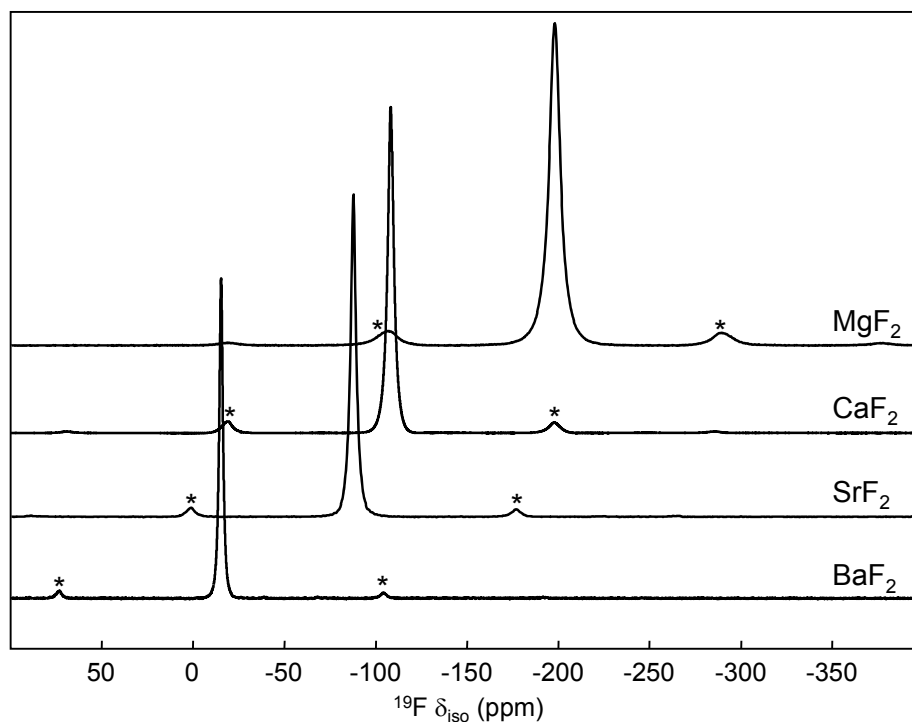

**Figure S2.**  $^{19}\text{F}$  MAS NMR spectra of alkaline earth fluorides obtained at a magnetic field of 7.0 T using spinning frequencies of 25 kHz. The asterisks indicate spinning sidebands.

### Solid state NMR and PXRD study of $\text{ScF}_3$

$\text{ScF}_3$  was recently studied by both  $^{19}\text{F}$  and  $^{45}\text{Sc}$  solid-state MAS NMR but the reported results<sup>1</sup> appear to us somewhat surprising and the results obtained in our study were also not straightforward to interpret.

Firstly, two different crystalline structures are reported for  $\text{ScF}_3$  at ambient temperature and pressure: a cubic one<sup>2,3</sup> ( $\text{ReO}_3$  type, space group:  $\text{Pm-3m}$ ) and a rhombohedral one<sup>4-6</sup> (distorted  $\text{ReO}_3$  type, space group:  $\text{R32}$ ). Lo *et al.* report that their  $\text{ScF}_3$  sample adopts a rhombohedral structure. However the small  $2\theta$  range of their powder X-ray diffraction (PXRD) pattern<sup>1</sup> does not allow confirming this assumption since both cubic and rhombohedral structures give very similar patterns, except for large  $2\theta$  values. The PXRD patterns recorded for our sample (Aldrich, 99.99%, lot number 04937HE) on the  $2\theta$  ranges  $20\text{-}125^\circ$ ,  $117.7\text{-}119.3^\circ$ ,  $139.5\text{-}142.5^\circ$  and  $146.1\text{-}149.5^\circ$  are shown in Figure 3. These diagrams do not evidence any rhombohedral splitting (Table 1) indicating that  $\text{ScF}_3$  adopts a cubic structure at ambient temperature and pressure, in agreement with a recent study of the pronounced negative thermal expansion (NTE) of  $\text{ScF}_3$ .<sup>7</sup>

Both cubic and rhombohedral structures of  $\text{ScF}_3$  contain a single Sc site and a single F site in the unit cell. Nevertheless, we were not able to reconstruct the  $^{19}\text{F}$  MAS NMR spectrum with a single resonance (Figure 2). A satisfying reconstruction is obtained with three lines having close  $\delta_{\text{iso}}$  values but significantly different chemical shift anisotropies (Table 2). Lo *et al.* report a  $\delta_{\text{iso}}$  value equal to  $-35.9$  ppm,<sup>1</sup> in good agreement with previously reported results,<sup>8</sup> and a CSA equal to ca. 305 ppm. This large value is in agreement with the observed intense spinning sidebands (the  $^{19}\text{F}$  reconstructed spectrum is not presented).

Moreover, Lo *et al.*<sup>1</sup> estimated the  $^{45}\text{Sc}$  quadrupolar coupling constant to 1.3(2) MHz and they claimed that “this small value is consistent with the high spherical symmetry around  $^{45}\text{Sc}$ ” whereas, as outlined by themselves, this nucleus has a moderately sized quadrupole moment ( $Q = -0.22 \times 10^{-28} \text{ m}^2$ ).<sup>9</sup> We have also recorded a  $^{45}\text{Sc}$  NMR spectrum of  $\text{ScF}_3$  (Figure 3). Assuming a cubic structure, in which the Sc atom occupy the site with  $m-3m$  symmetry (1a Wyckoff position), a quadrupolar coupling constant equal to zero is expected. As Lo *et al.*<sup>1</sup>, we observe a spinning sideband manifold, indicating quadrupolar frequency different from zero, and the shape of this spinning sideband manifolds likely

indicates some disorder in the structure. This spectrum is consequently difficult to reconstruct with a single set of parameters and the quadrupolar frequency can only be roughly estimated to 20 kHz ( $C_Q=280$  kHz). Whereas the determined  $^{45}\text{Sc}$   $\delta_{\text{iso}}$  value (-51.8 ppm) is very similar to the one determined by Lo et al. (-52 ppm), our quadrupolar coupling constant is significantly lower indicating less distorted  $\text{Sc}^{3+}$  sites.

At first glance, these results which can only be explained by the presence of some structural disorder in  $\text{ScF}_3$  seem puzzling. Nevertheless, disorder was previously mentioned in  $\text{ScF}_3$  to explain its marked NTE.<sup>7</sup> The assumed mechanism, *i. e.* rocking motion of essentially rigid  $\text{ScF}_6^{3-}$  octahedra, is supported by the large transverse component of the anisotropic displacement parameters (ADPs) for the fluoride anions.<sup>7</sup> ADPs may represent either atomic motion or static displacive disorder and static disorder was also invoked since it has been suggested for  $\text{AlF}_3$  above its rhomboedral-to-cubic phase transition (the Al-F-Al links are locally bent in the cubic phase).<sup>10,11</sup> Both dynamic (depending on the motion frequency) and static disorders explain the non-zero quadrupolar frequency of  $^{45}\text{Sc}$  (Figure 3) and the several lines used for the reconstruction of the  $^{19}\text{F}$  NMR spectrum (Figure 2 and Table 2).

Local structural disorder in  $\text{ScF}_3$  could also arise from incomplete fluorination leading to  $\text{ScF}_{3-2x}\text{O}_x\Box_x$  compounds and/or from occurrence of hydroxyl groups substituting fluoride ions into the network. Both these assumptions can be ruled out since the fluorinations of our sample, using either HF or  $\text{F}_2$  at 600°C, do not lead to any changes on the NMR spectra.

Since several lines are used for the reconstruction of the  $^{19}\text{F}$  NMR spectrum,  $^{19}\text{F}$   $\delta_{\text{iso}}$  value for  $\text{ScF}_3$  can only be roughly determined and the uncertainty is higher than for the others studied compounds. We choose the chemical shift value at the peak maximum, *i. e.* -36 ppm.

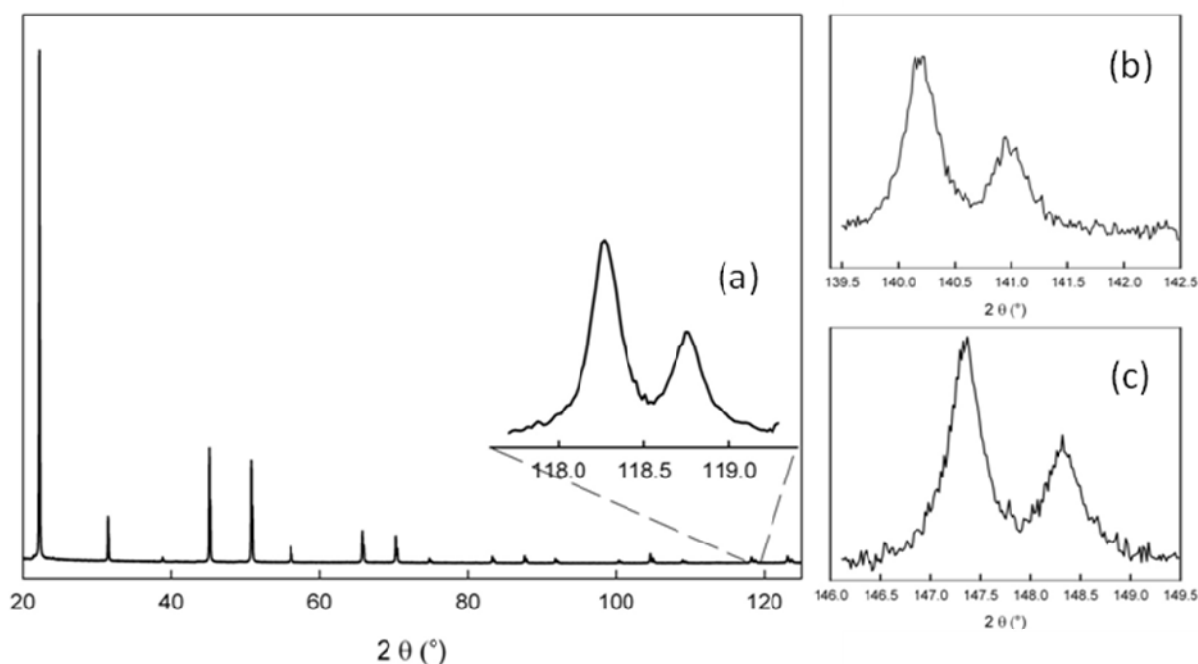

**Figure S3.** X-ray powder diffraction diagrams of  $\text{ScF}_3$ . In (a), (b) and (c) are shown the (4,2,0), (4,2,2) and (4,3,3) reflections, respectively. These diagrams were recorded under air, at room temperature with a PANalytical X'pert PRO diffractometer equipped with a X'Celerator detector using monochromated  $\text{CuK}\alpha$  radiation ( $\lambda = 1.54056$  Å). Measurements were done with an interpolated step of  $0.017^\circ$ , in the  $2\theta$  ranges 20-125°, (a) 117.7-119.3°, (b) 139.5-142.5° and (c) 146.1-149.5°, and total collecting times of 2 h 06 min, (a) 24 min, (b) 12 min and (c) 35 min.

**Table S1.** (h,k,l) reflections and corresponding  $2\theta$  values ( $^\circ$ ) of  $\text{ScF}_3$  assuming  $\text{Pm-3m}^3$  (ICSD<sup>12</sup> file number 36011) and  $\text{R32}^6$  (ICSD<sup>12</sup> file number 77071) space groups ( $\lambda = 1.54056 \text{ \AA}$ ).

| <b>Pm-3m</b> |   |   |           | <b>R32</b> |    |   |           |
|--------------|---|---|-----------|------------|----|---|-----------|
| h            | k | l | $2\theta$ | h          | k  | l | $2\theta$ |
| 0            | 2 | 4 | 118.373   | 0          | 2  | 4 | 117.725   |
|              |   |   |           | -2         | 0  | 4 | 118.070   |
| 2            | 2 | 4 | 140.376   | 2          | 2  | 4 | 139.010   |
|              |   |   |           | -2         | 2  | 4 | 139.711   |
|              |   |   |           | -2         | -2 | 4 | 139.948   |
| 0            | 3 | 4 | 147.565   | 0          | 3  | 4 | 146.189   |
| 0            | 0 | 5 | 147.565   | 0          | 0  | 5 | 146.602   |
|              |   |   |           | -3         | 0  | 4 | 147.019   |

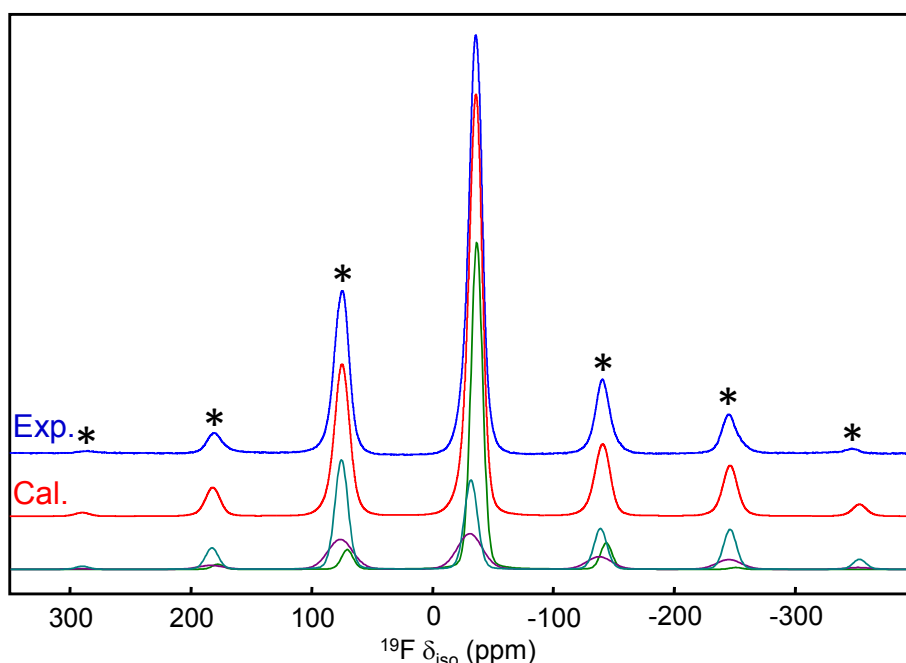

**Figure S4.** Experimental (exp.) and reconstructed (cal.)  $^{19}\text{F}$  MAS NMR spectra of  $\text{ScF}_3$  obtained at a magnetic field of 7.0 T using a spinning frequency of 30 kHz. The three individual contributions to the reconstructed spectrum are shown below. The asterisks indicate spinning sidebands.

**Table S2.**  $^{19}\text{F}$  isotropic chemical shifts ( $\delta_{\text{iso}}$ , ppm), chemical shift anisotropies ( $\delta_{\text{aniso}}$ , ppm), asymmetry parameters ( $\eta$ ), line widths and relative intensities (%) determined from the reconstruction of the  $^{19}\text{F}$  NMR spectrum of  $\text{ScF}_3$ .

| Line | $\delta_{\text{iso}} (\pm 0.5)$ | $\delta_{\text{aniso}} (\pm 10)$ | $\eta (\pm 0.05)$ | Width ( $\pm 0.5$ ) | Intensity ( $\pm 0.5$ ) |
|------|---------------------------------|----------------------------------|-------------------|---------------------|-------------------------|
| 1    | -36.5                           | 107                              | 0                 | 11.2                | 40.7                    |
| 2    | -31.7                           | -279                             | 0                 | 12.7                | 38.0                    |
| 3    | -30.8                           | -322                             | 0.2               | 24.1                | 21.3                    |

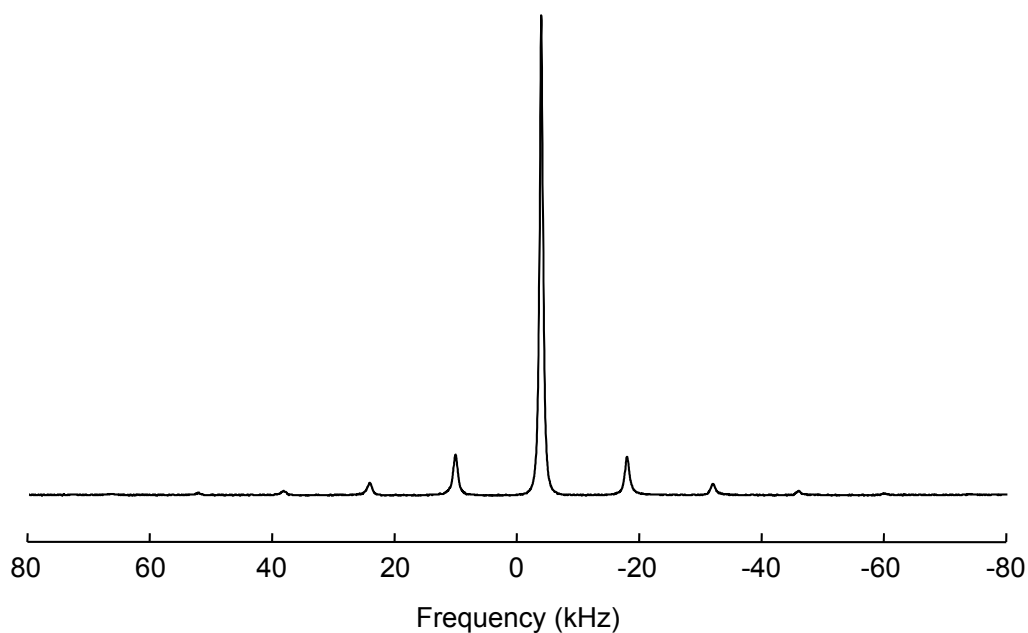

**Figure S5.** Experimental  $^{45}\text{Sc}$  SATRAS (SATellite TRANsition Spectroscopy<sup>13,14</sup>) MAS NMR spectrum of  $\text{ScF}_3$  recorded on a Bruker Avance 300 (7.0 T) spectrometer operating at a Larmor frequency of 72.906 MHz using a 2.5 mm probehead. The spinning frequency was 14 kHz. The quantitative excitation of all transitions<sup>15</sup> was ensured by using a short pulse duration (1  $\mu\text{s}$ ) with low-radio-frequency (RF) field strength (70 kHz). The recycle delay was set to 5 s. The  $^{45}\text{Sc}$  chemical shift was referenced to a 1 M  $\text{Sc}(\text{NO}_3)_3$  aqueous solution.

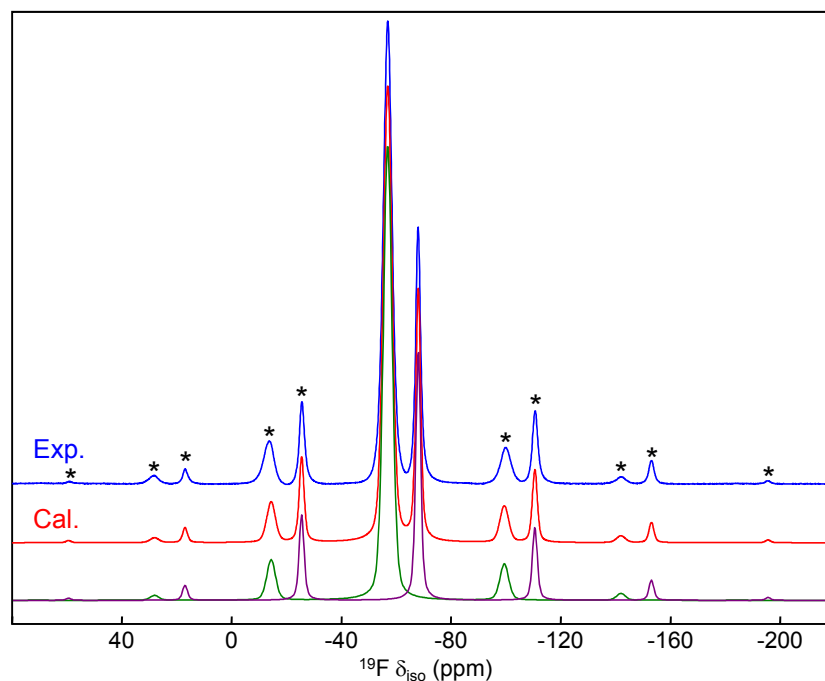

**Figure S6.**  $^{19}\text{F}$  experimental (exp.) and reconstructed (cal.)  $^{19}\text{F}$  MAS NMR spectra of  $\text{YF}_3$  recorded at a magnetic field of 17.6 T using a spinning frequency of 30 kHz. The two individual contributions to the reconstructed spectrum are shown below. The asterisks indicate spinning sidebands.

**Table S3.**  $^{19}\text{F}$  isotropic chemical shifts ( $\delta_{\text{iso}}$ , ppm), chemical shift anisotropies ( $\delta_{\text{aniso}}$ , ppm), asymmetry parameters ( $\eta$ ), line widths (ppm), relative intensities (%) determined from the reconstruction of the  $^{19}\text{F}$  NMR spectrum of  $\text{YF}_3$  and line assignment.

| Line | $\delta_{\text{iso}}$ ( $\pm 0.2$ ) | $\delta_{\text{aniso}}$ ( $\pm 5$ ) | $\eta$ ( $\pm 0.05$ ) | Width ( $\pm 0.1$ ) | Intensity ( $\pm 0.5$ ) | Assignment |
|------|-------------------------------------|-------------------------------------|-----------------------|---------------------|-------------------------|------------|
| 1    | -56.9                               | -42.5                               | 0.75                  | 3.8                 | 66.4                    | F2         |
| 2    | -68.1                               | -76.5                               | 0.80                  | 2.1                 | 33.6                    | F1         |

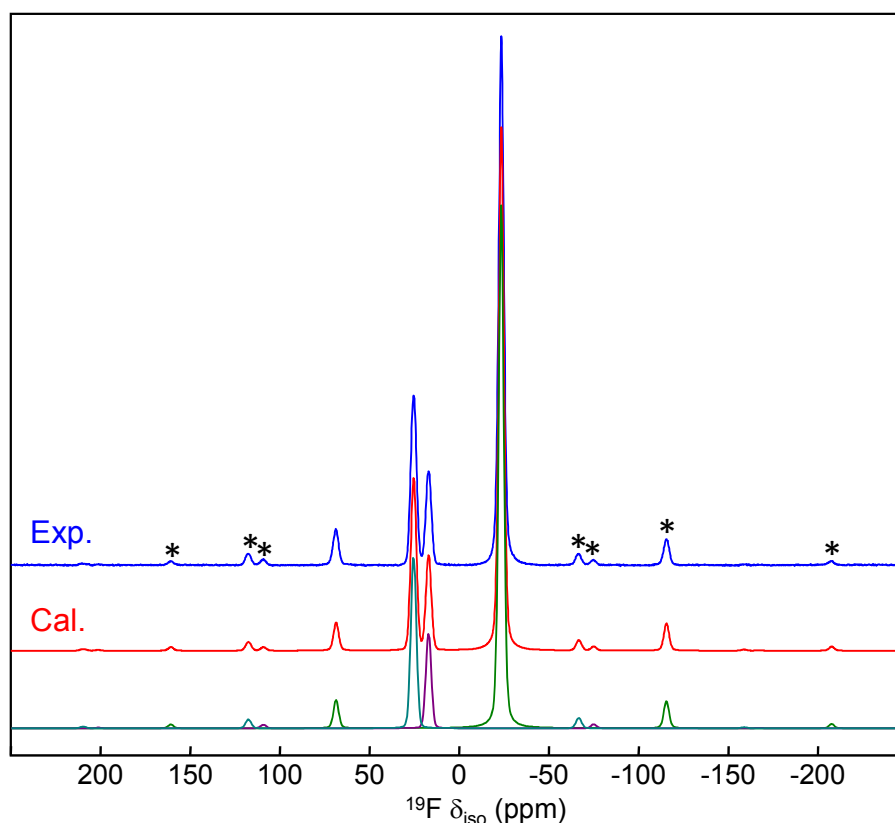

**Figure S7.**  $^{19}\text{F}$  experimental (exp.) and reconstructed (cal.) MAS NMR spectra of  $\text{LaF}_3$  recorded at a magnetic field of 17.6 T using a spinning frequency of 65 kHz. The three individual contributions to the reconstructed spectra are shown below. The asterisks indicate spinning sidebands.

**Table S4.**  $^{19}\text{F}$  isotropic chemical shifts ( $\delta_{\text{iso}}$ , ppm), chemical shift anisotropies ( $\delta_{\text{aniso}}$ , ppm), asymmetry parameters ( $\eta$ ), line widths (ppm), relative intensities (%) determined from the reconstruction of the  $^{19}\text{F}$  NMR spectrum of  $\text{LaF}_3$  and line assignment.

| Line | $\delta_{\text{iso}}$ ( $\pm 0.2$ ) | $\delta_{\text{aniso}}$ ( $\pm 5$ ) | $\eta$ ( $\pm 0.05$ ) | Width ( $\pm 0.1$ ) | Intensity ( $\pm 0.5$ ) | Assignment |
|------|-------------------------------------|-------------------------------------|-----------------------|---------------------|-------------------------|------------|
| 1    | -23.6                               | -71                                 | 0.9                   | 3.3                 | 66.7                    | F1         |
| 2    | 16.9                                | 66                                  | 0.55                  | 3.5                 | 11.3                    | F3         |
| 3    | 25.3                                | 78                                  | 0.55                  | 3.6                 | 22.0                    | F2         |

**Table S5.** Parameters used to generate the OTF USPP pseudopotentials. Details on the string can be found on the Castep website (<http://www.castep.org/>) in the documentation section.

| Atom                | OTF USPP string                                                                                             |
|---------------------|-------------------------------------------------------------------------------------------------------------|
| F                   | 2 1.4 16.537 18.375 20.212 20UU:21UU(qc=7.5)[]                                                              |
| Li                  | 1 1.2 11 13.2 15 10U:20UU(qc=5.5)[]                                                                         |
| Na                  | 2 1.3 1.3 1.0 16 19 21 20UU:30UU:21U(qc=7)[]                                                                |
| K                   | 2 1.8 1.8 1.6 11 14.7 16.7 30U:40UU:31UU(qc=5.5)[]                                                          |
| Rb                  | 2 2.5 2.5 2.1 5.5 6.6 8.1 40U:50U+0U+0.125:41UU(qc=3.5)[]                                                   |
| Cs                  | 2 2.7 2.7 1.6 4.4 5.9 7.4 50U:60U+0U+0.125:51UU(qc=3.5)[]                                                   |
| Mg                  | 2 1.6 2 1.4 6 7 8 30NH:21U:31UU:32LGG(qc=4.5)[]                                                             |
| Ca                  | 3 1.6 2 1.4 7.5 9.2 10.3 30U=-1.72:40U=-0.14:<br>31U=-1.03U=+0.25:32U=+0U=+1[]                              |
| Ca<br>shift 1.81 eV | 3 1.6 2 1.4 7.5 9.2 10.3 30U=-1.72:40U=-0.14:<br>31U=-1.03U=+0.25:32U=+0@+0.0665U=+1@+0.0665[]              |
| Sr                  | 3 2 2 1.2 7.4 9.2 11 40U:50U:41UU:42UU[]                                                                    |
| Ba                  | 2 3 2.9 2.2 6.4 8.1 9 50U:60UU:51U2.5U2.5(qc=3.5)[]                                                         |
| Sc                  | 3 1.8 1.8 1.6 9.6 10.8 11.7 30U=-2.01:40U=-0.16:<br>31U=-1.235U=+0.25:32U=-0.125U=+0.25[]                   |
| Sc<br>shift 1.96 eV | 3 1.8 1.8 1.6 9.6 10.8 11.7 30U=-2.01:40U=-0.16:<br>31U=-1.235U=+0.25:<br>32U=-0.125@0.0720U=+0.25@0.0720[] |
| La                  | 2 2 2 1.4 8 12 13 50N:60NH:51UU:52LGG:<br>43U1.6+0U1.6+0.1{5d0.9,4f0.1}(qc=6)[]                             |
| La<br>shift 4.55 eV | 2 2 2 1.4 8 12 13 50N:60NH:51UU:52LGG:<br>43U1.6+0@0.1672U1.6+0.1@0.1672{5d0.9,4f0.1}(qc=6)[]               |
| Y                   | 3 2 2 2 8.5 10 11.1 40U:50U:41UU:42UU[]                                                                     |

**Table S6.** Fractional atomic coordinates from the initial (IS)<sup>16</sup> and and PBE-DFT geometry-optimized (APO) structures for MgF<sub>2</sub>.

| Atom | Site |     | <i>x</i> | <i>y</i> | <i>z</i> |
|------|------|-----|----------|----------|----------|
| Mg   | 2a   |     | 0        | 0        | 0        |
| F    | 4f   | IS  | 0.3028   | 0.3028   | 0        |
|      |      | APO | 0.3022   | 0.3022   | 0        |

**Table S7.** Mg-F bond lengths and F-Mg-F bond angles deduced from the initial<sup>16</sup> (IS) and PBE-DFT geometry-optimized (APO) structures for MgF<sub>2</sub>.

| Bond lengths/Å |       | Bond angles/° |       |
|----------------|-------|---------------|-------|
| IS             | APO   | IS            | APO   |
| 1.979          | 1.975 | 81.04         | 81.22 |
| 1.984          | 1.986 | 98.96         | 98.78 |



**Table S8.** Eigenvectors of the calculated  $^{25}\text{Mg}$  EFG tensor, after optimization, expressed in Cartesian coordinates for  $\text{MgF}_2$  at the (0,0,0) position. The definition of the Cartesian axis with respect to the lattice parameters is given below.

| Axis     | $V_{xx}$ | $V_{yy}$ | $V_{zz}$ |
|----------|----------|----------|----------|
| <i>i</i> | 0.7071   | 0        | -0.7071  |
| <i>j</i> | 0.7071   | 0        | 0.7071   |
| <i>k</i> | 0        | 1        | 0        |

With  $\begin{pmatrix} a \\ b \\ c \end{pmatrix} = \begin{pmatrix} 4.6213 & 0.0000 & 0.0000 \\ 0.0000 & 4.6213 & 0.0000 \\ 0.0000 & 0.0000 & 3.0159 \end{pmatrix} \times \begin{pmatrix} i \\ j \\ k \end{pmatrix}$

and  $a = b = 4.6213 \text{ \AA}$ ,  $c = 3.0159 \text{ \AA}$ ;  $\alpha = \beta = \gamma = 90^\circ$

**Table S9.** Fractional atomic coordinates from the initial (IS)<sup>17</sup> and PBE-DFT geometry-optimized (APO) structures for  $\text{YF}_3$ .

| Atom | Site |     | <i>x</i> | <i>y</i> | <i>z</i> |
|------|------|-----|----------|----------|----------|
| Y    | 4c   | IS  | 0.3673   | 1/4      | 0.0591   |
|      |      | APO | 0.3687   | 1/4      | 0.0604   |
| F1   | 4c   | IS  | 0.5227   | 1/4      | 0.5910   |
|      |      | APO | 0.5231   | 1/4      | 0.5906   |
| F2   | 8d   | IS  | 0.1652   | 0.0643   | 0.3755   |
|      |      | APO | 0.1655   | 0.0629   | 0.3775   |

**Table S10.** Y-F bond lengths deduced from the initial<sup>17</sup> (IS) and PBE-DFT geometry-optimized (APO) structures for  $\text{YF}_3$ .

| Bond lengths/ $\text{\AA}$ | IS         | APO        |
|----------------------------|------------|------------|
| Y-F1                       | 2.282      | 2.285      |
|                            | 2.287      | 2.294      |
|                            | 2.538      | 2.528      |
| Y-F2                       | 2.281 (x2) | 2.291 (x2) |
|                            | 2.299 (x2) | 2.296 (x2) |
|                            | 2.310 (x2) | 2.299 (x2) |

**Table S11.** Fractional atomic coordinates from the initial (IS)<sup>18</sup> and PBE-DFT geometry-optimized (APO) structures for  $\text{LaF}_3$ .

| Atom | Site |     | <i>x</i> | <i>y</i> | <i>z</i> |
|------|------|-----|----------|----------|----------|
| La   | 6f   | IS  | 0.6598   | 0        | 1/4      |
|      |      | APO | 0.6578   | 0        | 1/4      |
| F1   | 12g  | IS  | 0.3659   | 0.0536   | 0.0813   |
|      |      | APO | 0.3688   | 0.0584   | 0.0805   |
| F2   | 4d   | IS  | 1/3      | 2/3      | 0.1830   |
|      |      | APO | 1/3      | 2/3      | 0.1825   |
| F3   | 2a   |     | 0        | 0        | 1/4      |

**Table S12.** La-F bond lengths deduced from the initial<sup>18</sup> (IS) and PBE-DFT geometry-optimized (APO) structures for LaF<sub>3</sub>.

| Bond lengths/Å | IS         | APO        |
|----------------|------------|------------|
| La-F1          | 2.458 (x2) | 2.457 (x2) |
|                | 2.489 (x2) | 2.477 (x2) |
|                | 2.638 (x2) | 2.629 (x2) |
|                | 3.003 (x2) | 3.038 (x2) |
| La-F2          | 2.417 (x2) | 2.415 (x2) |
| La-F3          | 2.444      | 2.458      |

**Table S13.** Eigenvectors of the calculated <sup>139</sup>La EFG tensor in LaF<sub>3</sub> for IS, expressed in a Cartesian coordinate system (*i, j, k*) and along the crystallographic axis (*a, b, c*) for the La position at (0.6578, 0, 1/4). The definition of the Cartesian axis with respect to the lattice parameters is given below.

| Axis     | $V_{xx}$ | $V_{yy}$ | $V_{zz}$ |
|----------|----------|----------|----------|
| <i>i</i> | 0.2880   | -0.8660  | -0.4087  |
| <i>j</i> | 0.4989   | 0.5      | -0.7079  |
| <i>k</i> | 0.8174   | 0        | 0.5761   |
| <i>a</i> | 0.0466   | -0.1391  | -0.0654  |
| <i>b</i> | 0.0933   | 0.0000   | -0.1308  |
| <i>c</i> | 0.1106   | 0.0000   | 0.0789   |

$$\text{With } \begin{pmatrix} a \\ b \\ c \end{pmatrix} = \begin{pmatrix} 6.2224 & -3.5925 & 0 \\ 0 & 7.1850 & 0 \\ 0 & 0 & 7.3510 \end{pmatrix} \times \begin{pmatrix} i \\ j \\ k \end{pmatrix}$$

$$\text{and } a = b = 7.1850 \text{ \AA}, c = 7.3510 \text{ \AA}; \alpha = \beta = 90^\circ, \gamma = 120^\circ$$

**Table S14.** Experimental  $^{19}\text{F}$  isotropic chemical shifts relative to  $\text{CFCl}_3$  and calculated  $^{19}\text{F}$  isotropic shieldings for the eleven compounds additionally considered in Figure 5. The “calculated”  $^{19}\text{F}$  isotropic chemical shifts according to  $\delta_{\text{iso}}/\text{CFCl}_3 = -0.80(3) \sigma_{\text{iso}} + 89(9)$  are also reported.

| Compounds                             | Site | $\sigma_{\text{iso}}^{\text{calc.}}$ (ppm) | $\delta_{\text{iso}}^{\text{calc.}}$ (ppm) | $\delta_{\text{iso}}^{\text{exp.}}$ (ppm) |
|---------------------------------------|------|--------------------------------------------|--------------------------------------------|-------------------------------------------|
| $\text{CdF}_2$                        | F1   | 350.9 <sup>a</sup>                         | -192                                       | -190.7 <sup>c</sup>                       |
| $\text{HgF}_2$                        | F1   | 356.4 <sup>a</sup>                         | -196                                       | -197.6 <sup>d</sup>                       |
| $\alpha\text{-PbF}_2$                 | F1   | 140.8 <sup>a</sup>                         | -24                                        | -20.5 <sup>e</sup>                        |
|                                       | F2   | 176.6 <sup>a</sup>                         | -52                                        | -57.7 <sup>e</sup>                        |
| $\alpha\text{-AlF}_3$                 | F1   | 336.2 <sup>a</sup>                         | -180                                       | -172.0 <sup>f</sup>                       |
| $\text{Na}_5\text{Al}_3\text{F}_{14}$ | F1   | 358.9 <sup>a</sup>                         | -198                                       | -191.4 <sup>g</sup>                       |
|                                       | F2   | 326.1 <sup>a</sup>                         | -172                                       | -165.0 <sup>g</sup>                       |
|                                       | F3   | 356.9 <sup>a</sup>                         | -197                                       | -189.5 <sup>g</sup>                       |
| $\text{ZnF}_2$                        | F1   | 363.0 <sup>b</sup>                         | -201                                       | -200.7 <sup>c</sup>                       |
| $\text{GaF}_3$                        | F1   | 314.0 <sup>b</sup>                         | -162                                       | -167.2 <sup>c</sup>                       |
| $\text{InF}_3$                        | F1   | 364.1 <sup>b</sup>                         | -202                                       | -206.2 <sup>c</sup>                       |
| $\text{BaLiF}_3$                      | F1   | 238.8 <sup>b</sup>                         | -102                                       | -98.2 <sup>c</sup>                        |
| $\beta\text{-BaAlF}_5$                | F1   | 307.4 <sup>b</sup>                         | -157                                       | -154.6 <sup>h</sup>                       |
|                                       | F2   | 287.9 <sup>b</sup>                         | -141                                       | -138.9 <sup>h</sup>                       |
|                                       | F3   | 268.5 <sup>b</sup>                         | -126                                       | -121.3 <sup>h</sup>                       |
|                                       | F4   | 254.9 <sup>b</sup>                         | -115                                       | -109.2 <sup>h</sup>                       |
|                                       | F5   | 302.4 <sup>b</sup>                         | -153                                       | -148.8 <sup>h</sup>                       |
|                                       | F6   | 277.5 <sup>b</sup>                         | -133                                       | -127.5 <sup>h</sup>                       |
|                                       | F7   | 293.3 <sup>b</sup>                         | -146                                       | -140.8 <sup>h</sup>                       |
|                                       | F8   | 245.4 <sup>b</sup>                         | -107                                       | -99.0 <sup>h</sup>                        |
|                                       | F9   | 271.7 <sup>b</sup>                         | -128                                       | -124.5 <sup>h</sup>                       |
|                                       | F10  | 297.0 <sup>b</sup>                         | -149                                       | -144.6 <sup>h</sup>                       |
| $\text{Ba}_3\text{Al}_2\text{F}_{12}$ | F1   | 310.9 <sup>b</sup>                         | -160                                       | -153.3 <sup>h</sup>                       |
|                                       | F2   | 308.2 <sup>b</sup>                         | -158                                       | -151.6 <sup>h</sup>                       |
|                                       | F3   | 165.1 <sup>b</sup>                         | -43                                        | -30.5 <sup>h</sup>                        |
|                                       | F4   | 186.6 <sup>b</sup>                         | -60                                        | -50.8 <sup>h</sup>                        |
|                                       | F5   | 267.6 <sup>b</sup>                         | -125                                       | -115.7 <sup>h</sup>                       |
|                                       | F6   | 265.4 <sup>b</sup>                         | -123                                       | -113.0 <sup>h</sup>                       |
|                                       | F7   | 279.8 <sup>b</sup>                         | -135                                       | -127.9 <sup>h</sup>                       |
|                                       | F8   | 302.3 <sup>b</sup>                         | -153                                       | -146.4 <sup>h</sup>                       |

<sup>a</sup> Calculated values from reference [19].

<sup>b</sup> Calculated values from reference [20].

<sup>c</sup> Experimental values from reference [21].

<sup>d</sup> Experimental values from reference [22].

<sup>e</sup> Experimental values from reference [23].

<sup>f</sup> Experimental values from reference [24].

<sup>g</sup> Experimental values from reference [25].

<sup>h</sup> Experimental values from reference [26].

## References

- <sup>1</sup> A. Y. H. Lo, V. Sudarsan, S. Sivakumar, F. van Veggel, R. W. Schurko, *J. Am. Chem. Soc.* 2007, **129**, 4687.
- <sup>2</sup> K. H. Jack, *Acta Cryst.* 1957, **10**, 780.
- <sup>3</sup> P. P. Fedorov, V. Trncova, G. I. Kocherba, B. P. Sobolev, *Kristallografiya* 1995, **40**, 716 ; *Crystallogr. Rep.* 1995, **40**, 663.
- <sup>4</sup> W. Nowacki, *Z. Kristallogr. Kristallgeom. Kristallphys. Kristallchem.* 1939, **101**, 273.
- <sup>5</sup> E. G. Ippolitov, A. G. Maklachkov, *Inorg. Mater. (Engl. Transl.)* 1970, **6**, 1251.
- <sup>6</sup> R. Loesch, C. Hebecker, Z. Z. Ranft, *Anorg. Allg. Chem.* 1982, **491**, 199.
- <sup>7</sup> B. K. Greve, K. L. Martin, P. L. Lee, P. J. Chupas, K. W. Chapman, A. P. Wilkinson, *J. Am. Chem. Soc.* 2010, **132**, 15496.
- <sup>8</sup> L. M. Avkhutskii, Y. V. Gagarinskii, S. A. Polishchuk, S. P. Gabuda, *Spectrosc. Lett.* 1969, **2**, 75.
- <sup>9</sup> P. Pyykko, *Mol. Phys.* 2001, **99**, 1617.
- <sup>10</sup> S. Chaudhuri, P. J. Chupas, M. Wilson, P. Madden, C. P. Grey, *J. Phys. Chem. B* 2004, **108**, 3437.
- <sup>11</sup> P. J. Chupas, S. Chaudhuri, J. C. Hanson, X. Qiu, P. L. Lee, S. D. Shastri, S. J. L. Billinge, C. P. Grey, *J. Am. Chem. Soc.* 2004, **126**, 4756.
- <sup>12</sup> Inorganic Crystal Structure Database (ICSD), version 1.7.1, 2010.
- <sup>13</sup> J. Skibsted, N. C. Nielsen, H. Bildsoe, H. J. Jakobsen, *J. Magn. Reson.*, 1991, **95**, 88.
- <sup>14</sup> B. B. C. Jäger, in *Solid State NMR II*, (Ed.: B. Blümich), Springer-Verlag: Berlin, 1994, 163.
- <sup>15</sup> A. Samoson, E. Lippmaa, *Phys. Rev. B*, 1983, **28**, 6567.
- <sup>16</sup> W. H. Baur, A. A. Khan, *Acta Crystallogr.* 1971, **B27**, 2133.
- <sup>17</sup> A. K. Cheetham, N. Norman, *Acta Chem. Scand. Ser. A* 1974, **28**, 55.
- <sup>18</sup> A. Zalkin, D. H. Templeton, *Acta Crystallogr.* 1985, **B41**, 91.
- <sup>19</sup> J. M. Griffin, J. R. Yates, A. J. Berry, S. Wimperis, S. E. Ashbrook, *J. Am. Chem. Soc.* 2010, **132**, 15651.
- <sup>20</sup> A. Zheng, S.-B. Liu, and F. Deng, *J. Phys. Chem. C* 2009, **113**, 15018.
- <sup>21</sup> B. Bureau, G. Silly, J.-Y. Buzaré, J. Emery, *Chem. Phys.* 1999, **249**, 89.
- <sup>22</sup> A. T. Kreinbrink, C. D. Sazavsky, J. W. Pyrz, D. G. A. Nelson, S. R. Honkonen, *J. Magn. Reson.* 1990, **88**, 267.
- <sup>23</sup> F. Wang, C. P. Grey, *J. Am. Chem. Soc.* 1998, **120**, 970.
- <sup>24</sup> P. J. Chupas, M. F. Ciruolo, J. C. Hanson, C. P. Grey, *J. Am. Chem. Soc.* 2001, **123**, 1694.
- <sup>25</sup> L.-S. Du, A. Samoson, T. Tuherm, C. P. Grey, *Chem. Mater.* 2000, **12**, 3611.
- <sup>26</sup> C. Martineau, C. Legein, J.-Y. Buzaré, F. Fayon, *Phys. Chem. Chem. Phys.* 2009, **11**, 950.
